# Supplementary material for: Auxin-Cytokinin Cross Talk in Somatic Embryogenesis of Coffea canephora
Source: MDPI journal article supplement (doi:10.3390/plants11152013), 2022-08-02
Supplement: s1 [file s1]

Supplementary Material

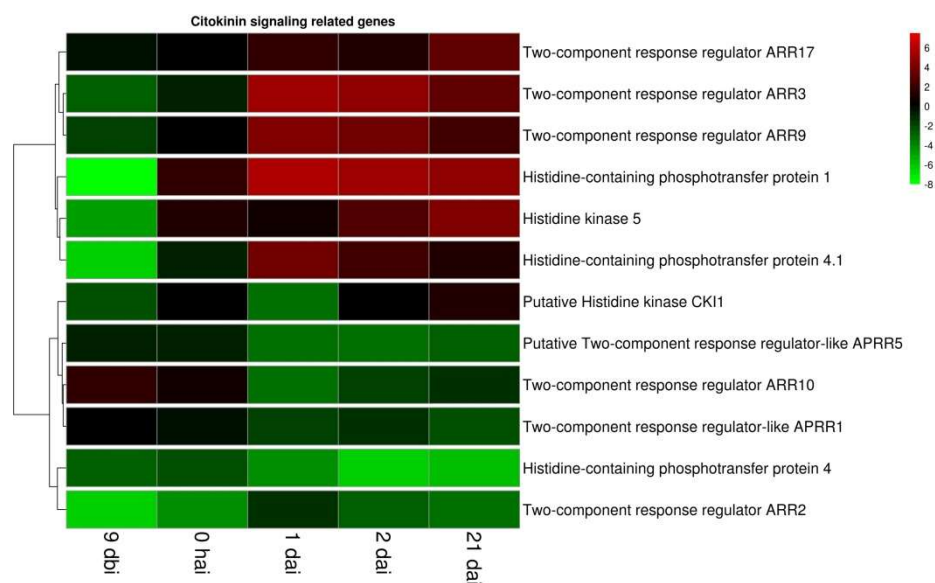

**Figure S1.** Expression profiles of genes involved in auxin and CKs signaling. The heatmap shows changes in transcript levels in different sampling points (-14 days vs. -9, 0, 1, 2, and 21 days). Gene names were annotated using Ugene and Blast2GO software. Change in expression during SE of *C. canephora*. Hierarchical clustering was used to group genes with similar expression profiles. The red color represents upregulated genes, and the green represents downregulated genes (log2 fold-change values).

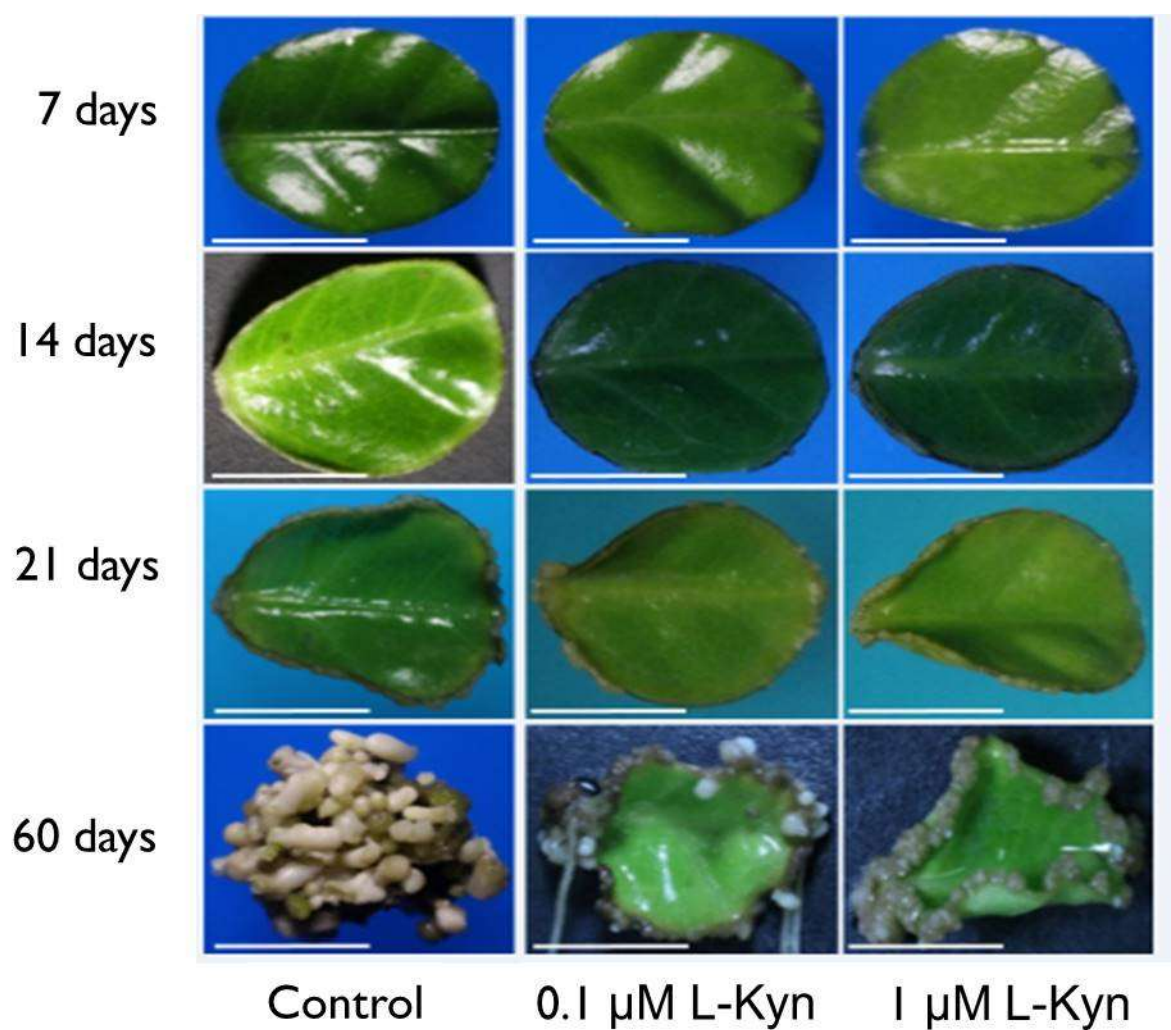

**Figure S2.** Induction of SE in *C. canephora* in the presence of L-Kyn. The SE process was performed as described in the methodology with some modifications. L-Kyn was added only in the preconditioning stage.

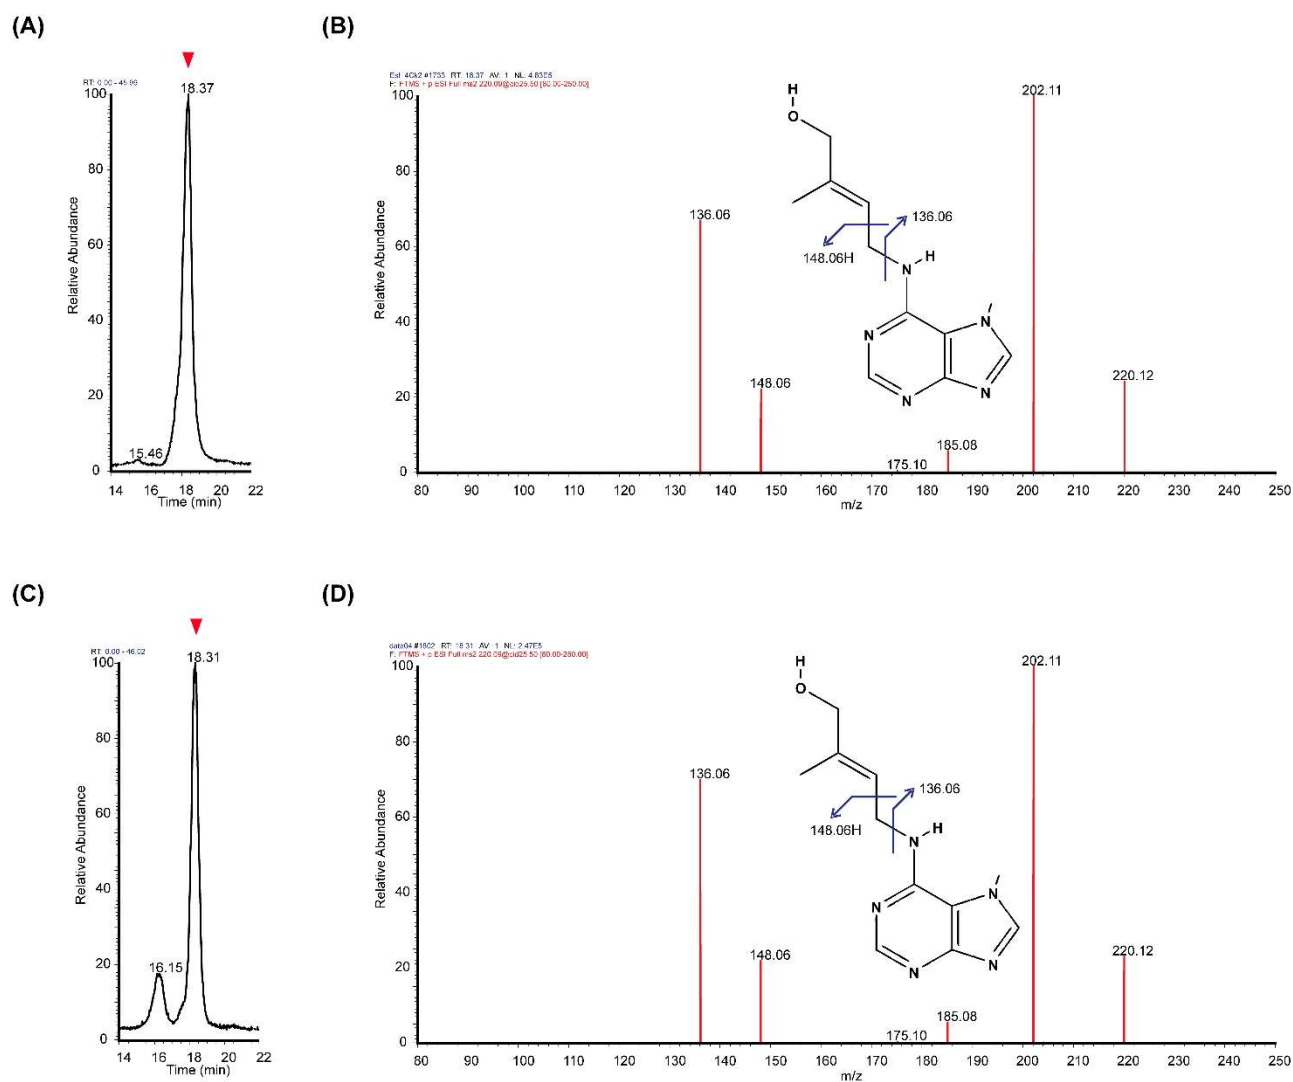

**Figure S3.** Chromatograms and fragmentation pattern obtained for *trans*-Zeatin (*tZ*) by LC-MS/MS. (A and B) Chromatograms and fragmentation pattern for analyte. (C and D) Chromatograms and fragmentation pattern obtained from pre-induced leaf samples. Red arrowheads in chromatograms indicate the retention time for *tZ*.

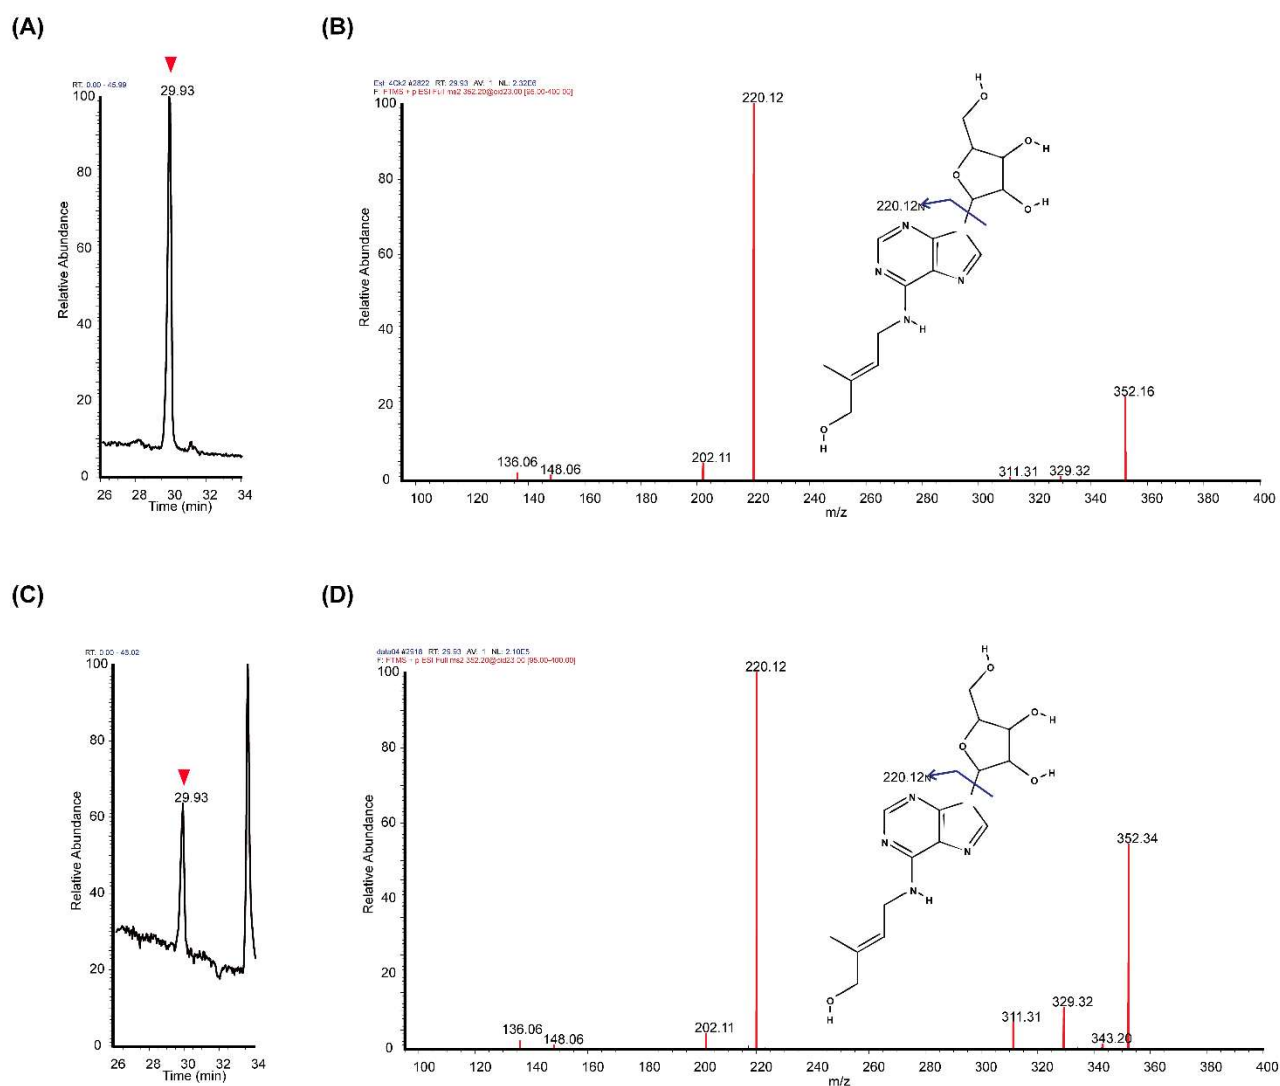

**Figure S4.** Chromatograms and fragmentation pattern obtained for *trans*-Zeatin Riboside (*tZR*) by LC-MS/MS. (A and B) Chromatograms and fragmentation pattern for analyte. (C and D) Chromatograms and fragmentation pattern obtained from pre-induced leaf samples. Red arrowheads in chromatograms indicate the retention time for *tZR*.

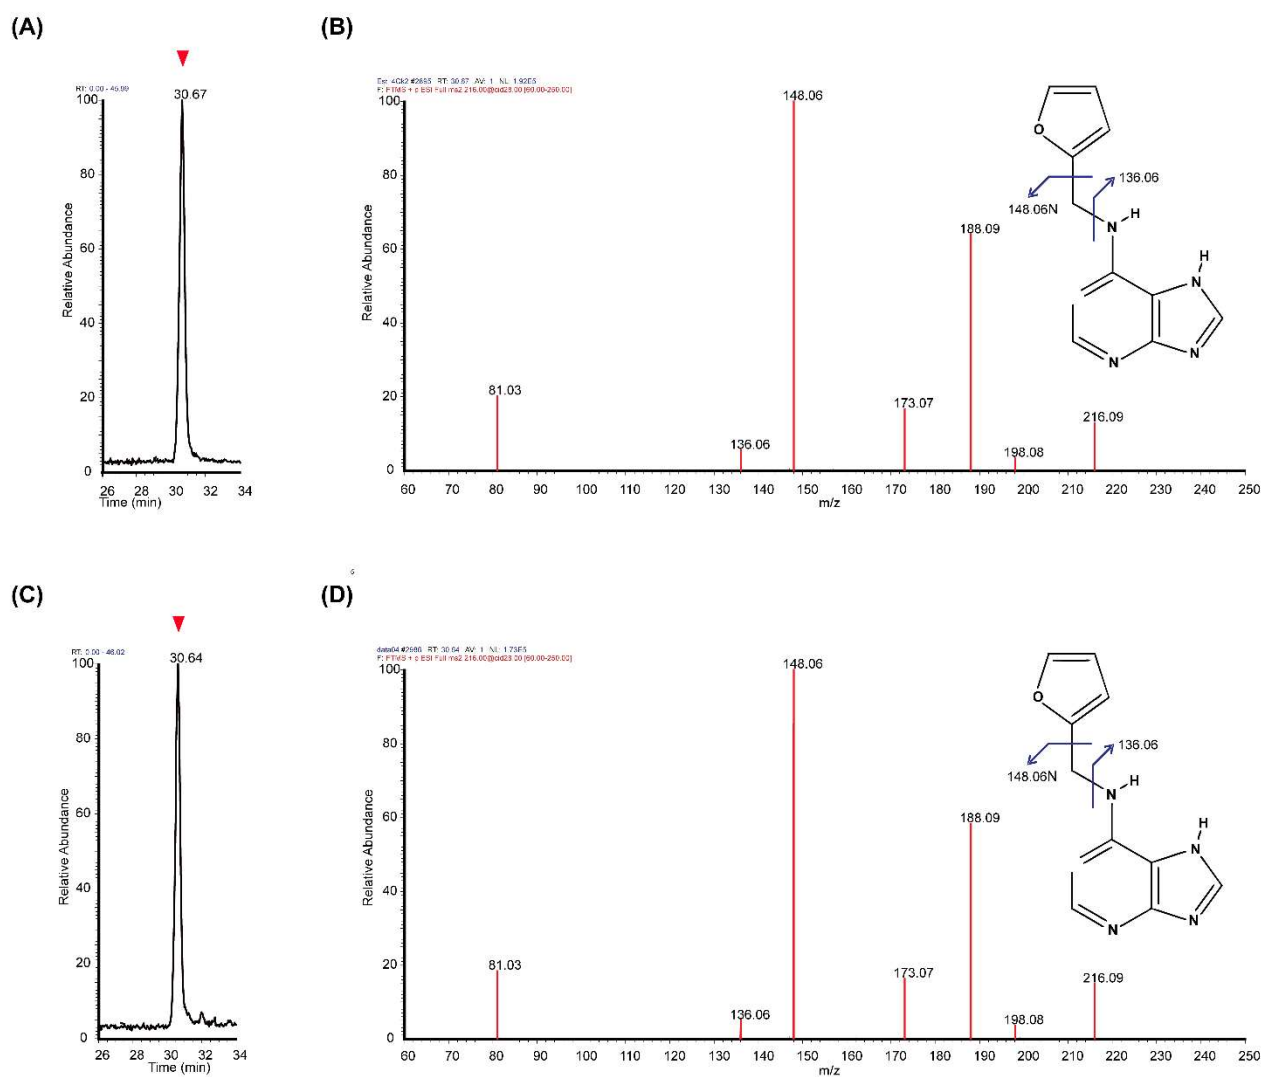

**Figure S5.** Chromatograms and fragmentation pattern obtained for Kinetin (K) by LC-MS/MS. (A and B) Chromatograms and fragmentation pattern for analyte. (C and D) Chromatograms and fragmentation pattern obtained from pre-induced leaf samples. Red arrowheads in chromatograms indicate the retention time for K.

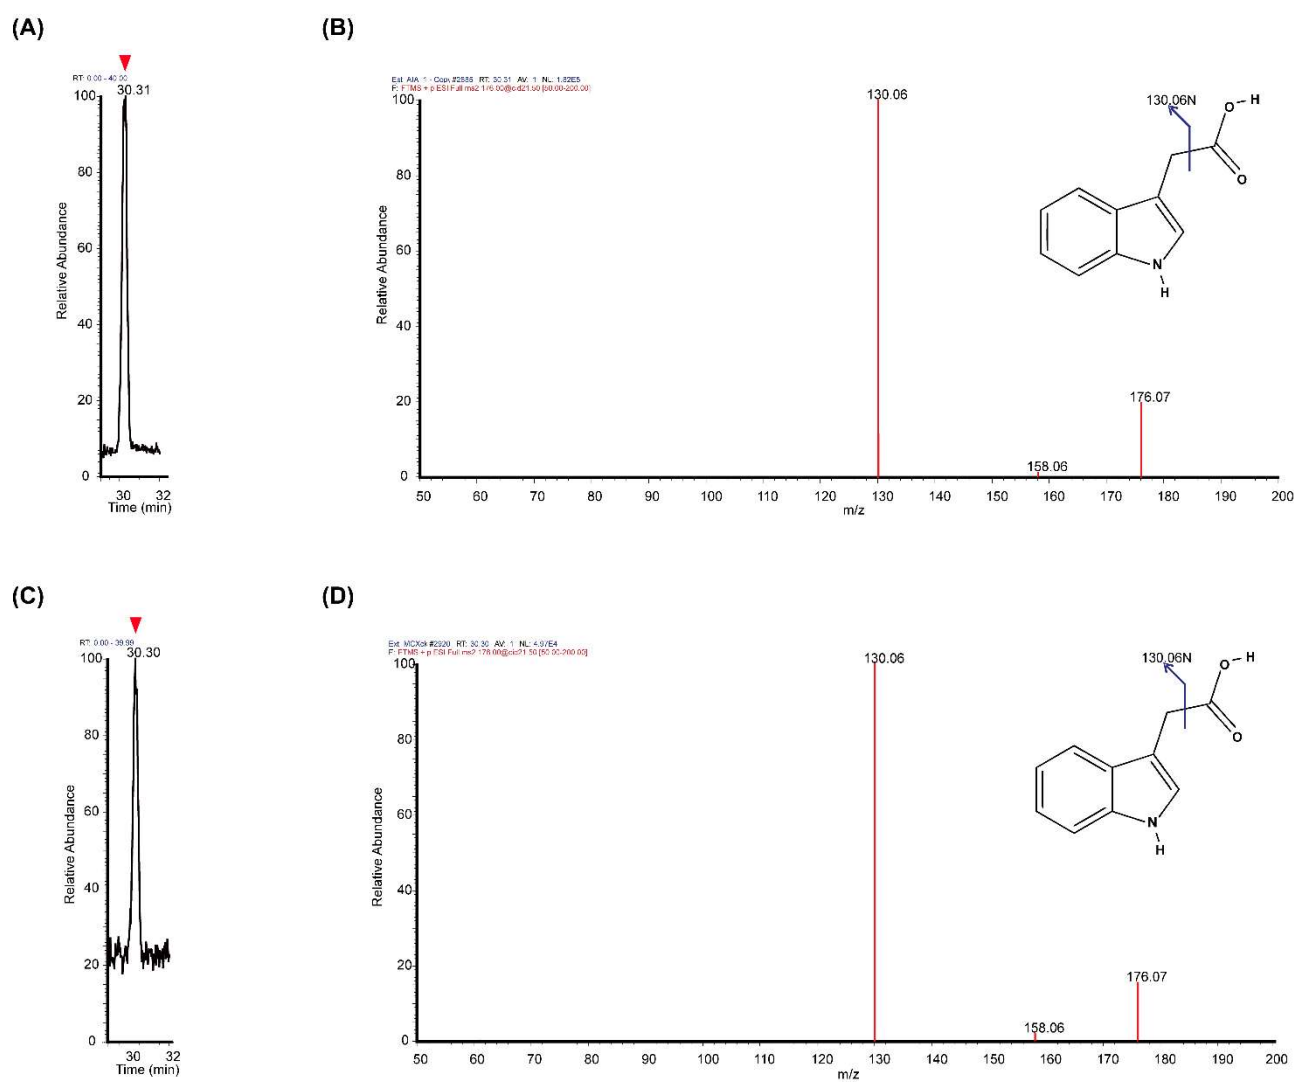

**Figure S6.** Chromatograms and fragmentation pattern obtained for Indole-3-Acetic Acid (IAA) by LC-MS/MS. (A and B) Chromatograms and fragmentation pattern for analyte. (C and D) Chromatograms and fragmentation pattern obtained from pre-induced leaf samples. Red arrowheads in chromatograms indicate the retention time for IAA.

**Table S1.** Gene-specific primer sequences used for Quantitative Real-time RT-qPCR amplification.

| Gene               | Sequences of the primers        |
|--------------------|---------------------------------|
| <i>CcIPT1</i>      | F-5'-GTCCAACCTCCTTCATCTACTCC-3' |
|                    | R-5'-GTACACGTGTTCTCCTTGACAG-3'  |
| <i>CcIPT5</i>      | F-5'-GTACAGGGTTACCACTTGTTCC-3'  |
|                    | R-5'-GTGGATGTTTCTGGTTCTCC-3'    |
| <i>CcCKK3</i>      | F-5'-CCTCTACTGCATGGAAGTTGTC-3'  |
|                    | R-5'-GTACGACAGCAGACATTCTCTC-3'  |
| <i>CcCKK9</i>      | F-5'-GTCGAGTTCCTGGATAGAGTTC-3'  |
|                    | R-5'-GTGGATGTTTCTGGTTCTCC-3'    |
| <i>CcARR2</i>      | F-5'-CAGCAGATGTCTACAGGAAGG-3'   |
|                    | R-5'-GAGACCACAGTTAGGTCATTGC-3'  |
| <i>CcUBIQUITIN</i> | F-5'-TTCGTCAAGACCCTCACC-3'      |
|                    | R-5'-TCAAACGGAGAACCAAGTG-3'     |

**Table S2.** Overview of tandem mass spectral and UHPLC features for the PGRs detected.

| PGR <sup>a</sup>           | Parent ion formula                                            | Parent MH <sup>+</sup> | Fragments                             | CID <sup>a</sup> (V) | Analyte RT <sup>b</sup> (min) | Plant RT <sup>b</sup> time (min) |
|----------------------------|---------------------------------------------------------------|------------------------|---------------------------------------|----------------------|-------------------------------|----------------------------------|
| trans-Zeatin (tZ)          | C <sub>10</sub> H <sub>13</sub> N <sub>5</sub> O              | 220.12                 | 202.11, 148.06, 136.06                | 25.5                 | 18.32 ± 0.07                  | 18.31 ± 0.06                     |
| Zeatin riboside (ZR)       | C <sub>15</sub> H <sub>21</sub> N <sub>5</sub> O <sub>5</sub> | 352.16                 | 220.12, 202.11, 148.06, 136.06        | 23.0                 | 29.93 ± 0.06                  | 29.93 ± 0.07                     |
| Kinetin (K)                | C <sub>10</sub> H <sub>9</sub> N <sub>5</sub> O               | 216.09                 | 188.09, 173.07, 148.06, 136.06, 81.03 | 28.0                 | 30.67 ± 0.07                  | 30.64 ± 0.06                     |
| Indole-3-acetic acid (IAA) | C <sub>10</sub> H <sub>9</sub> NO <sub>2</sub>                | 176.07                 | 130.06                                | 21.5                 | 30.31 ± 0.09                  | 30.30 ± 0.08                     |

a, Collision-induced dissociation; b, indicates the retention time (RT) in minutes (min). To confirm the identity of recorded PGRs, UHPLC coupled to mass spectrometry was used. In the MS/MS analysis, the collision of the protonated ion of tZ and ZR showed the characteristics of ions that matched the adenine with part of (m/z 148.08) or without (m/z 136.06) the isoprenoid side chain (Table S1). The ZR MS/MS spectra displayed the neutral loss of m/z 132 corresponding to ribose, thus resulting in the ion m/z 220.12. In the K spectra, the protonated ion collision showed that the characteristics of ions matched the adenine with part of (m/z 148.08) or without (m/z 136.06) the aromatic side chain. The Aux IAA showed the characteristic fragment m/z 130.06. When fragmentation patterns from analytes and *C. canephora* extracts were compared, similar MS/MS spectra were found at the same RT (Figures S3-S6).
